# Supplementary material
Source: Springer Nature journal article supplement (https://www.springermedizin.de/resource/supplementary/13002_2012_280_MOESM7_ESM.pdf/9627534)

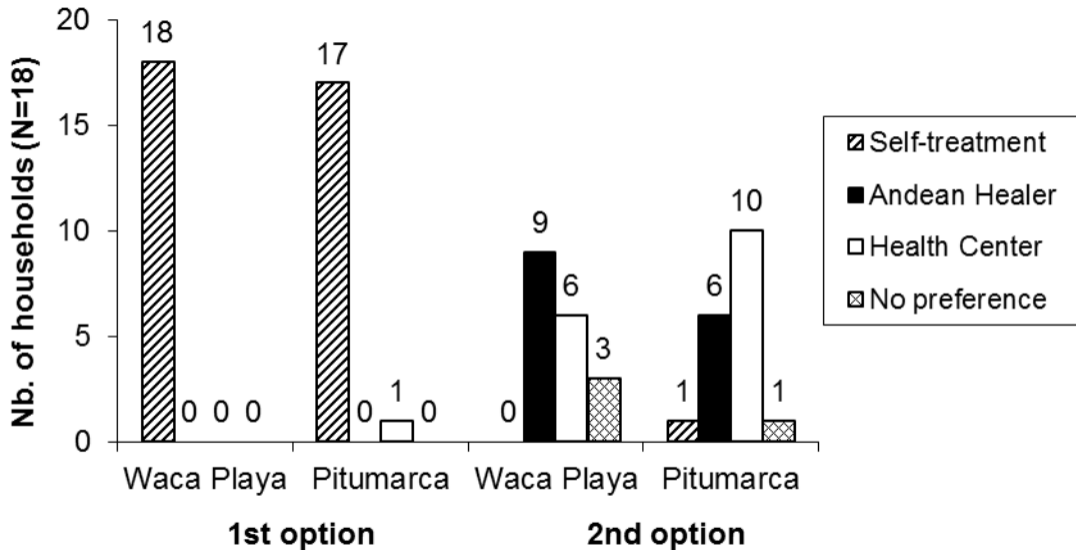

Supplement: MOESM7 [file 9627534]
